# Supplementary material for: Patterns of Positive Selection in Six Mammalian Genomes
Source: PLoS Genet. 2008 Aug 1;4(8):e1000144. doi: 10.1371/journal.pgen.1000144 (PMC2483296; doi:10.1371/journal.pgen.1000144)
Supplement: Table S1 — Minimum species configurations required for likelihood ratio tests. (0.02 MB PDF) [file pgen.1000144.s008.pdf]

Table S1: Minimum species configurations required for likelihood ratio tests.

| LRT                | required species                    | ortholog groups |
|--------------------|-------------------------------------|-----------------|
| A: all branches    | human, 2 other                      | 16,529          |
| B: primate branch  | human, macaque, mouse or rat, dog   | 9,566           |
| C: primate clade   | human, chimp or macaque, 1 other    | 14,425          |
| D: rodent branch   | human, mouse, rat, dog              | 10,762          |
| E: rodent clade    | human, mouse, rat                   | 8,991           |
| F: human lineage   | human, chimp, 1 other               | 14,558          |
| G: chimp lineage   | human, chimp, 1 other               | 14,558          |
| H: hominid branch  | human, chimp, macaque, 1 other      | 10,980          |
| K: macaque lineage | human, macaque, mouse or rat or dog | 12,499          |
