# Supplementary material for: Patterns of Positive Selection in Six Mammalian Genomes
Source: PLoS Genet. 2008 Aug 1;4(8):e1000144. doi: 10.1371/journal.pgen.1000144 (PMC2483296; doi:10.1371/journal.pgen.1000144)
Supplement: Table S2 — GO categories over-represented among predicted PSGs. (0.11 MB PDF) [file pgen.1000144.s009.pdf]

Table S2: GO categories over-represented among predicted PSGs.

| Category           | Description                                                                                                               | Gene number |      |         | Fold Enrich. | P-value               | P-value               |
|--------------------|---------------------------------------------------------------------------------------------------------------------------|-------------|------|---------|--------------|-----------------------|-----------------------|
|                    |                                                                                                                           | All         | PSGs | E[PSGs] |              | MWU                   | FET                   |
| Biological process |                                                                                                                           |             |      |         |              |                       |                       |
| GO:0007606         | sensory perception of chemical stimulus                                                                                   | 255         | 24   | 6.2     | 3.9          | $4.3 \times 10^{-39}$ | $1.5 \times 10^{-08}$ |
| GO:0006955         | immune response                                                                                                           | 457         | 55   | 11.1    | 5.0          | $1.4 \times 10^{-33}$ | $1.4 \times 10^{-22}$ |
| GO:0007608         | sensory perception of smell                                                                                               | 229         | 15   | 5.5     | 2.7          | $6.1 \times 10^{-31}$ | $4.8 \times 10^{-04}$ |
| GO:0050896         | response to stimulus                                                                                                      | 1887        | 101  | 45.7    | 2.2          | $4.4 \times 10^{-26}$ | $1.1 \times 10^{-14}$ |
| GO:0002376         | immune system process                                                                                                     | 608         | 59   | 14.7    | 4.0          | $6.7 \times 10^{-25}$ | $1.7 \times 10^{-19}$ |
| GO:0006952         | defense response                                                                                                          | 412         | 34   | 10.0    | 3.4          | $1.3 \times 10^{-20}$ | $9.8 \times 10^{-10}$ |
| GO:0051707         | response to other organism                                                                                                | 138         | 13   | 3.3     | 3.9          | $3.8 \times 10^{-15}$ | $6.0 \times 10^{-05}$ |
| GO:0007600         | sensory perception                                                                                                        | 559         | 31   | 13.5    | 2.3          | $1.1 \times 10^{-12}$ | $1.7 \times 10^{-05}$ |
| GO:0002526         | acute inflammatory response                                                                                               | 55          | 11   | 1.3     | 8.3          | $4.7 \times 10^{-11}$ | $6.7 \times 10^{-08}$ |
| GO:0050909         | sensory perception of taste                                                                                               | 25          | 8    | 0.6     | 13.2         | $1.4 \times 10^{-10}$ | $8.3 \times 10^{-08}$ |
| GO:0009611         | response to wounding                                                                                                      | 321         | 23   | 7.8     | 3.0          | $3.2 \times 10^{-10}$ | $6.9 \times 10^{-06}$ |
| GO:0051704         | multi-organism process                                                                                                    | 222         | 17   | 5.4     | 3.2          | $3.3 \times 10^{-10}$ | $4.7 \times 10^{-05}$ |
| GO:0006954         | inflammatory response                                                                                                     | 233         | 20   | 5.6     | 3.5          | $8.4 \times 10^{-10}$ | $1.6 \times 10^{-06}$ |
| GO:0002541         | activation of plasma proteins during acute inflammatory response                                                          | 28          | 7    | 0.7     | 10.3         | $1.3 \times 10^{-09}$ | $3.5 \times 10^{-06}$ |
| GO:0006956         | complement activation                                                                                                     | 28          | 7    | 0.7     | 10.3         | $1.3 \times 10^{-09}$ | $3.5 \times 10^{-06}$ |
| GO:0009607         | response to biotic stimulus                                                                                               | 188         | 14   | 4.5     | 3.1          | $1.7 \times 10^{-09}$ | $3.2 \times 10^{-04}$ |
| GO:0045087         | innate immune response                                                                                                    | 70          | 8    | 1.7     | 4.7          | $1.9 \times 10^{-09}$ | $3.7 \times 10^{-04}$ |
| GO:0009615         | response to virus                                                                                                         | 69          | 7    | 1.7     | 4.2          | $3.0 \times 10^{-08}$ | $2.4 \times 10^{-03}$ |
| GO:0009617         | response to bacterium                                                                                                     | 67          | 6    | 1.6     | 3.7          | $4.2 \times 10^{-08}$ | $7.9 \times 10^{-03}$ |
| GO:0002682         | regulation of immune system process                                                                                       | 60          | 11   | 1.5     | 7.6          | $8.5 \times 10^{-08}$ | $1.0 \times 10^{-06}$ |
| GO:0016064         | immunoglobulin mediated immune response                                                                                   | 36          | 8    | 0.9     | 9.2          | $1.1 \times 10^{-07}$ | $1.5 \times 10^{-05}$ |
| GO:0042742         | defense response to bacterium                                                                                             | 61          | 5    | 1.5     | 3.4          | $1.2 \times 10^{-07}$ | $2.2 \times 10^{-02}$ |
| GO:0002253         | activation of immune response                                                                                             | 40          | 9    | 1.0     | 9.3          | $1.2 \times 10^{-07}$ | $1.9 \times 10^{-06}$ |
| GO:0007186         | G-protein coupled receptor protein signaling pathway                                                                      | 792         | 39   | 19.2    | 2.0          | $1.4 \times 10^{-07}$ | $2.5 \times 10^{-05}$ |
| GO:0002252         | immune effector process                                                                                                   | 69          | 11   | 1.7     | 6.6          | $1.5 \times 10^{-07}$ | $3.0 \times 10^{-06}$ |
| GO:0006959         | humoral immune response                                                                                                   | 56          | 9    | 1.4     | 6.6          | $1.6 \times 10^{-07}$ | $7.2 \times 10^{-06}$ |
| GO:0002684         | positive regulation of immune system process                                                                              | 49          | 9    | 1.2     | 7.6          | $1.7 \times 10^{-07}$ | $8.4 \times 10^{-06}$ |
| GO:0050778         | positive regulation of immune response                                                                                    | 49          | 9    | 1.2     | 7.6          | $1.7 \times 10^{-07}$ | $8.4 \times 10^{-06}$ |
| GO:0050776         | regulation of immune response                                                                                             | 59          | 11   | 1.4     | 7.7          | $1.8 \times 10^{-07}$ | $1.0 \times 10^{-06}$ |
| GO:0002455         | humoral immune response mediated by circulating immunoglobulin                                                            | 24          | 6    | 0.6     | 10.3         | $3.0 \times 10^{-07}$ | $1.8 \times 10^{-05}$ |
| GO:0019724         | B cell mediated immunity                                                                                                  | 37          | 8    | 0.9     | 8.9          | $3.2 \times 10^{-07}$ | $1.8 \times 10^{-05}$ |
| GO:0006968         | cellular defense response                                                                                                 | 55          | 5    | 1.3     | 3.8          | $3.5 \times 10^{-07}$ | $1.1 \times 10^{-02}$ |
| GO:0019882         | antigen processing and presentation                                                                                       | 27          | 4    | 0.7     | 6.1          | $5.7 \times 10^{-07}$ | $5.0 \times 10^{-03}$ |
| GO:0006958         | complement activation, classical pathway                                                                                  | 23          | 6    | 0.6     | 10.8         | $6.1 \times 10^{-07}$ | $1.4 \times 10^{-05}$ |
| GO:0050877         | neurological process                                                                                                      | 811         | 34   | 19.6    | 1.7          | $7.5 \times 10^{-07}$ | $1.5 \times 10^{-03}$ |
| GO:0006957         | complement activation, alternative pathway                                                                                | 11          | 2    | 0.3     | 7.5          | $1.5 \times 10^{-06}$ | $2.8 \times 10^{-02}$ |
| GO:0019835         | cytolysis                                                                                                                 | 15          | 3    | 0.4     | 8.3          | $2.2 \times 10^{-06}$ | $5.2 \times 10^{-03}$ |
| GO:0051240         | positive regulation of multicellular organismal process                                                                   | 61          | 10   | 1.5     | 6.8          | $2.6 \times 10^{-06}$ | $1.1 \times 10^{-05}$ |
| GO:0002449         | lymphocyte mediated immunity                                                                                              | 53          | 10   | 1.3     | 7.8          | $5.7 \times 10^{-06}$ | $2.5 \times 10^{-06}$ |
| GO:0009605         | response to external stimulus                                                                                             | 462         | 27   | 11.2    | 2.4          | $5.8 \times 10^{-06}$ | $4.2 \times 10^{-05}$ |
| GO:0002460         | adaptive immune response based on somatic recombination of immune receptors built from immunoglobulin superfamily domains | 57          | 13   | 1.4     | 9.4          | $8.0 \times 10^{-06}$ | $1.1 \times 10^{-08}$ |
| GO:0002250         | adaptive immune response                                                                                                  | 58          | 13   | 1.4     | 9.3          | $1.5 \times 10^{-05}$ | $1.1 \times 10^{-08}$ |
| GO:0007338         | single fertilization                                                                                                      | 39          | 4    | 0.9     | 4.2          | $1.7 \times 10^{-05}$ | $1.4 \times 10^{-02}$ |
| Molecular function |                                                                                                                           |             |      |         |              |                       |                       |
| GO:0004984         | olfactory receptor activity                                                                                               | 229         | 15   | 5.5     | 2.7          | $6.9 \times 10^{-36}$ | $4.8 \times 10^{-04}$ |
| GO:0001584         | rhodopsin-like receptor activity                                                                                          | 540         | 30   | 13.1    | 2.3          | $8.4 \times 10^{-18}$ | $2.2 \times 10^{-05}$ |
| GO:0004930         | G-protein coupled receptor activity                                                                                       | 625         | 37   | 15.1    | 2.4          | $2.5 \times 10^{-14}$ | $5.1 \times 10^{-07}$ |
| GO:0004888         | (*) transmembrane receptor activity                                                                                       | 972         | 55   | 23.5    | 2.3          | $4.0 \times 10^{-12}$ | $3.3 \times 10^{-09}$ |
| GO:0004872         | (*) receptor activity                                                                                                     | 1411        | 89   | 34.1    | 2.6          | $2.5 \times 10^{-10}$ | $1.9 \times 10^{-17}$ |
| GO:0008527         | taste receptor activity                                                                                                   | 14          | 5    | 0.3     | 14.8         | $1.3 \times 10^{-08}$ | $1.4 \times 10^{-05}$ |
| GO:0008009         | chemokine activity                                                                                                        | 34          | 5    | 0.8     | 6.1          | $3.7 \times 10^{-07}$ | $1.3 \times 10^{-03}$ |
| GO:0042379         | chemokine receptor binding                                                                                                | 34          | 5    | 0.8     | 6.1          | $3.7 \times 10^{-07}$ | $1.3 \times 10^{-03}$ |
| GO:0030414         | protease inhibitor activity                                                                                               | 110         | 6    | 2.7     | 2.3          | $4.1 \times 10^{-07}$ | $5.1 \times 10^{-02}$ |
| GO:0004866         | endopeptidase inhibitor activity                                                                                          | 110         | 6    | 2.7     | 2.3          | $4.1 \times 10^{-07}$ | $5.1 \times 10^{-02}$ |

|                    |                                |      |     |      |      |                                         |                                         |
|--------------------|--------------------------------|------|-----|------|------|-----------------------------------------|-----------------------------------------|
| GO:0019965         | interleukin binding            | 33   | 1   | 0.8  | 1.3  | <b><math>2.2 \times 10^{-06}</math></b> | $5.5 \times 10^{-01}$                   |
| GO:0005125         | cytokine activity              | 184  | 13  | 4.5  | 2.9  | <b><math>7.8 \times 10^{-06}</math></b> | $5.8 \times 10^{-04}$                   |
| GO:0008173         | RNA methyltransferase activity | 19   | 1   | 0.5  | 2.2  | <b><math>8.4 \times 10^{-06}</math></b> | $3.7 \times 10^{-01}$                   |
| GO:0004907         | interleukin receptor activity  | 28   | 1   | 0.7  | 1.5  | <b><math>2.1 \times 10^{-05}</math></b> | $5.0 \times 10^{-01}$                   |
| GO:0017171         | serine hydrolase activity      | 150  | 9   | 3.6  | 2.5  | <b><math>2.1 \times 10^{-05}</math></b> | $1.1 \times 10^{-02}$                   |
| Cellular component |                                |      |     |      |      |                                         |                                         |
| GO:0005576         | extracellular region           | 889  | 43  | 21.5 | 2.0  | <b><math>2.6 \times 10^{-11}</math></b> | $4.5 \times 10^{-05}$                   |
| GO:0005615         | extracellular space            | 354  | 19  | 8.6  | 2.2  | <b><math>6.8 \times 10^{-08}</math></b> | $4.1 \times 10^{-03}$                   |
| GO:0042611         | MHC protein complex            | 14   | 4   | 0.3  | 11.8 | <b><math>2.8 \times 10^{-07}</math></b> | $2.8 \times 10^{-04}$                   |
| GO:0031224         | (*) intrinsic to membrane      | 3817 | 168 | 92.4 | 1.8  | <b><math>7.7 \times 10^{-06}</math></b> | <b><math>1.4 \times 10^{-16}</math></b> |
| GO:0042612         | MHC class I protein complex    | 12   | 2   | 0.3  | 6.9  | <b><math>8.9 \times 10^{-06}</math></b> | $3.3 \times 10^{-02}$                   |
| GO:0016021         | (*) integral to membrane       | 3799 | 168 | 91.9 | 1.8  | <b><math>8.9 \times 10^{-06}</math></b> | <b><math>1.0 \times 10^{-16}</math></b> |

Bold indicates FWER <0.05 (Holm correction).
