# Supplementary material for: Patterns of Positive Selection in Six Mammalian Genomes
Source: PLoS Genet. 2008 Aug 1;4(8):e1000144. doi: 10.1371/journal.pgen.1000144 (PMC2483296; doi:10.1371/journal.pgen.1000144)
Supplement: Table S3 — PANTHER categories over-represented among predicted PSGs. (0.10 MB PDF) [file pgen.1000144.s010.pdf]

Table S3: PANTHER categories over-represented among genes predicted to be under positive selection.

| Category | Description                                       | Gene number |      |         | Fold Enrich. | P-value MWU                             | P-value FET                             |
|----------|---------------------------------------------------|-------------|------|---------|--------------|-----------------------------------------|-----------------------------------------|
|          |                                                   | All         | PSGs | E[PSGs] |              |                                         |                                         |
|          | Biological process                                |             |      |         |              |                                         |                                         |
| BP00148  | Immunity and defense                              | 968         | 76   | 23.4    | 3.2          | <b><math>2.2 \times 10^{-25}</math></b> | <b><math>3.0 \times 10^{-20}</math></b> |
| BP00184  | Olfaction                                         | 122         | 8    | 3.0     | 2.7          | <b><math>8.6 \times 10^{-15}</math></b> | $9.6 \times 10^{-03}$                   |
| BP00183  | Chemosensory perception                           | 128         | 8    | 3.1     | 2.6          | <b><math>1.3 \times 10^{-13}</math></b> | $1.3 \times 10^{-02}$                   |
| BP00155  | Macrophage-mediated immunity                      | 97          | 10   | 2.3     | 4.3          | <b><math>4.6 \times 10^{-09}</math></b> | <b><math>1.2 \times 10^{-04}</math></b> |
| BP00149  | T-cell mediated immunity                          | 134         | 15   | 3.2     | 4.6          | <b><math>1.2 \times 10^{-08}</math></b> | <b><math>8.7 \times 10^{-07}</math></b> |
| BP00157  | Natural killer cell mediated immunity             | 35          | 7    | 0.8     | 8.3          | <b><math>1.6 \times 10^{-08}</math></b> | <b><math>1.7 \times 10^{-05}</math></b> |
| BP00107  | Cytokine and chemokine mediated signaling pathway | 192         | 10   | 4.6     | 2.2          | <b><math>4.1 \times 10^{-08}</math></b> | $1.9 \times 10^{-02}$                   |
| BP00255  | Cytokine/chemokine mediated immunity              | 88          | 7    | 2.1     | 3.3          | <b><math>7.6 \times 10^{-08}</math></b> | $5.5 \times 10^{-03}$                   |
| BP00176  | Blood clotting                                    | 69          | 4    | 1.7     | 2.4          | <b><math>2.2 \times 10^{-07}</math></b> | $8.6 \times 10^{-02}$                   |
| BP00152  | B-cell- and antibody-mediated immunity            | 73          | 16   | 1.8     | 9.1          | <b><math>4.8 \times 10^{-07}</math></b> | <b><math>1.5 \times 10^{-11}</math></b> |
| BP00156  | Interferon-mediated immunity                      | 56          | 7    | 1.4     | 5.2          | <b><math>8.0 \times 10^{-07}</math></b> | $3.8 \times 10^{-04}$                   |
| BP00153  | Complement-mediated immunity                      | 40          | 7    | 1.0     | 7.2          | <b><math>6.0 \times 10^{-06}</math></b> | <b><math>4.3 \times 10^{-05}</math></b> |
| BP00150  | MHCI-mediated immunity                            | 12          | 2    | 0.3     | 6.9          | <b><math>1.6 \times 10^{-05}</math></b> | $3.3 \times 10^{-02}$                   |
| BP00151  | MHCII-mediated immunity                           | 12          | 3    | 0.3     | 10.3         | <b><math>3.4 \times 10^{-05}</math></b> | $2.6 \times 10^{-03}$                   |
| BP00288  | Granulocyte-mediated immunity                     | 47          | 7    | 1.1     | 6.2          | <b><math>3.4 \times 10^{-05}</math></b> | $1.3 \times 10^{-04}$                   |
| BP00240  | Fertilization                                     | 26          | 4    | 0.6     | 6.4          | <b><math>6.2 \times 10^{-05}</math></b> | $3.3 \times 10^{-03}$                   |
| BP00299  | Steroid hormone metabolism                        | 21          | 3    | 0.5     | 5.9          | <b><math>8.3 \times 10^{-05}</math></b> | $1.4 \times 10^{-02}$                   |
|          | Molecular function                                |             |      |         |              |                                         |                                         |
| MF00173  | Defense/immunity protein                          | 223         | 46   | 5.4     | 8.5          | <b><math>1.4 \times 10^{-35}</math></b> | <b><math>9.7 \times 10^{-30}</math></b> |
| MF00004  | Immunoglobulin receptor family member             | 66          | 27   | 1.6     | 16.9         | <b><math>4.4 \times 10^{-19}</math></b> | <b><math>1.0 \times 10^{-26}</math></b> |
| MF00224  | KRAB box transcription factor                     | 409         | 9    | 9.9     | 0.9          | <b><math>4.2 \times 10^{-13}</math></b> | $6.6 \times 10^{-01}$                   |
| MF00018  | Chemokine                                         | 29          | 4    | 0.7     | 5.7          | <b><math>2.0 \times 10^{-08}</math></b> | $5.0 \times 10^{-03}$                   |
| MF00102  | Protease inhibitor                                | 97          | 3    | 2.3     | 1.3          | <b><math>1.1 \times 10^{-07}</math></b> | $4.2 \times 10^{-01}$                   |
| MF00216  | Serine protease                                   | 140         | 10   | 3.4     | 3.0          | <b><math>1.6 \times 10^{-06}</math></b> | $2.2 \times 10^{-03}$                   |
| MF00250  | Serine protease inhibitor                         | 63          | 2    | 1.5     | 1.3          | <b><math>7.5 \times 10^{-06}</math></b> | $4.5 \times 10^{-01}$                   |
| MF00175  | Major histocompatibility complex antigen          | 15          | 4    | 0.4     | 11.0         | <b><math>1.1 \times 10^{-05}</math></b> | $3.7 \times 10^{-04}$                   |
| MF00177  | Other defense and immunity protein                | 50          | 4    | 1.2     | 3.3          | <b><math>1.7 \times 10^{-05}</math></b> | $3.2 \times 10^{-02}$                   |
| MF00174  | Complement component                              | 35          | 6    | 0.8     | 7.1          | <b><math>3.6 \times 10^{-05}</math></b> | $1.7 \times 10^{-04}$                   |
| MF00176  | Antibacterial response protein                    | 26          | 1    | 0.6     | 1.6          | <b><math>5.8 \times 10^{-05}</math></b> | $4.7 \times 10^{-01}$                   |

Bold indicates FWER < 0.05 (Holm correction).
